# Supplementary material for: Application of a Liquid-Liquid Microextraction Method Based on a Natural Hydrophobic Deep Eutectic Solvent for the Extraction of Plastic Migrants from Kombuchas
Source: MDPI journal article supplement (doi:10.3390/molecules27010178), 2021-12-28
Supplement: s1 [file s1]

**Supplementary Material. Application of a liquid-liquid microextraction method based on a natural hydrophobic deep eutectic solvent for the extraction of plastic migrants from kombuchas**

Antonio V. Herrera-Herrera <sup>1,2</sup>, Ruth Rodríguez-Ramos <sup>1</sup>, Álvaro Santana-Mayor <sup>1</sup>, Bárbara Socas-Rodríguez <sup>1</sup>, and Miguel Ángel Rodríguez-Delgado <sup>1</sup>

*<sup>1</sup>Departamento de Química, Unidad Departamental de Química Analítica, Facultad de Ciencias, Universidad de La Laguna (ULL). Avenida Astrofísico Francisco Sánchez, s/nº. 38206 San Cristóbal de La Laguna (Tenerife), España.*

*<sup>2</sup>Instituto Universitario de Bio-Orgánica Antonio González. Universidad de La Laguna (ULL). Avda. Astrofísico Fco. Sánchez, 2. 38206 San Cristóbal de La Laguna, España.*

**Table S1.** Characteristics of the analyzed samples

| Sample | Brand | Bottling format        | Flavor                    | Ingredients                                                                                                                                                                                                                                                                                | pH   | Nutritional facts              |                       |                           |
|--------|-------|------------------------|---------------------------|--------------------------------------------------------------------------------------------------------------------------------------------------------------------------------------------------------------------------------------------------------------------------------------------|------|--------------------------------|-----------------------|---------------------------|
|        |       |                        |                           |                                                                                                                                                                                                                                                                                            |      | Carbohydrate content (g/100 g) | Fat content (g/100 g) | Protein content (g/100 g) |
| K1     | A     | Glass with plastic cap | Original                  | Water, cane sugar, green tea                                                                                                                                                                                                                                                               | 3.10 | 1.8                            | <0.1                  | 0.06                      |
| K2     | A     | Glass with plastic cap | Ginger & turmeric         | Water, cane sugar, ginger, turmeric, lemon grass, lemon, green tea, black pepper and stevia infusion                                                                                                                                                                                       | 3.20 | 0.3                            | <0.1                  | <0.02                     |
| K3     | Ai    | Glass with plastic cap | Hibiscus                  | Water, cane sugar, grenade, hibiscus blossom and green tear                                                                                                                                                                                                                                | 2.88 | 0.2                            | 0.1                   | 0.7                       |
| K4     | B     | Glass with plastic cap | Green tea                 | Water, cane sugar and green tea                                                                                                                                                                                                                                                            | 2.88 | 3.6                            | 0.4                   | 0.2                       |
| K5     | B     | Glass with plastic cap | Red fruits                | Water, cane sugar, green tea, strawberry, blueberry and hibiscus blossom                                                                                                                                                                                                                   | 2.85 | 3.2                            | 0.3                   | <0.1                      |
| K6     | B     | Glass with plastic cap | Mojito                    | Water, cane sugar, green tea, lemon, lime and peppermint                                                                                                                                                                                                                                   | 2.80 | 3.0                            | 0.2                   | <0.3                      |
| K7     | B     | Glass with plastic cap | Ginger & lemon            | Water, cane sugar, green tea, ginger and lemon                                                                                                                                                                                                                                             | 2.89 | 1.6                            | 0.5                   | 0.1                       |
| K8     | B     | Glass with plastic cap | Apple, cinnamon & vanilla | Water, cane sugar, green tea, apple, cinnamon and vanilla                                                                                                                                                                                                                                  | 2.89 | 2.8                            | 0.5                   | <0.08                     |
| K9     | C     | Glass with plastic cap | Original                  | Water, green tea, black tea, yerba mate leaves, linden blossoms, lemon verbena, acanthus blossoms, lemon balm, nanah mint, nettle, rubella, elderflowers, raspberry leaves, marigold flowers, blackberry leaves, licorice root and cane sugar                                              | 3.19 | 4.3                            | <0.5                  | <0.5                      |
| K10    | C     | Glass with plastic cap | Sour cherry & mint        | Water, green tea, black tea, yerba mate leaves, linden blossoms, lemon verbena, acanthus blossoms, lemon balm, nanah mint, nettle, rubella, elderflowers, raspberry leaves, marigold flowers, blackberry leaves, licorice root, cane sugar, sour cherry, grape syrup, mint and lemon juice | 3.24 | 4.6                            | <0.5                  | <0.5                      |

|     |   |                        |                                   |                                                                                                                                                                                                                                                                          |      |      |       |      |
|-----|---|------------------------|-----------------------------------|--------------------------------------------------------------------------------------------------------------------------------------------------------------------------------------------------------------------------------------------------------------------------|------|------|-------|------|
| K11 | C | Glass with plastic cap | Lime & ginger                     | Water, green tea, black tea, yerba mate leaves, linden blossoms, lemon verbena, acanthus blossoms, lemon balm, nanah mint, nettle, rubella, elderflowers, raspberry leaves, marigold flowers, blackberry leaves, licorice root, cane sugar, lime juice, and ginger juice | 2.90 | 4.3  | <0.5  | <0.5 |
| K12 | D | Glass with plastic cap | Ginger & apple                    | Water, cane sugar, ginger, apple juice and green tea                                                                                                                                                                                                                     | 2.87 | 1.6  | <0.1  | <0.3 |
| K13 | D | Glass with plastic cap | Hibiscus & pomegranate            | Water, cane sugar, pomegranate juice, hibiscus infusion and green tea                                                                                                                                                                                                    | 2.81 | 0.2  | 0.0   | 0.7  |
| K14 | D | Glass with plastic cap | Cucumber & lemon verbena          | Water, cane sugar, cucumber, lemon verbena, green tea,                                                                                                                                                                                                                   | 2.85 | <0.5 | <0.1  | <0.3 |
| K15 | E | Glass with plastic cap | Açaí & red fruits                 | Water, green tea, cane sugar, acai, hibiscus, apple, rose hip, strawberry and red fruit natural aroma                                                                                                                                                                    | 2.80 | 3.5  | <0.1  | <0.1 |
| K16 | E | Glass with plastic cap | Mango & strawberry                | Water, green tea, cane sugar, red tea, mango and strawberry                                                                                                                                                                                                              | 2.93 | 3.7  | <0.1  | <0.1 |
| K17 | F | Glass with plastic cap | Apple & pear                      | Water, sugar, dextrose, tea, apple juice, citric acid, natural flavoring, ascorbic acid                                                                                                                                                                                  | 2.92 | 4.2  | 0.0   | 0.0  |
| K18 | G | Glass with plastic cap | Raspberry, strawberry & camu-camu | Water, cane sugar, green tea, strawberry, raspberry, erythritol, steviol glycosides, camu-camu                                                                                                                                                                           | 2.86 | 3.7  | <0.2  | <0.2 |
| K19 | G | Glass with plastic cap | Yuzu, spirulina & mint            | Water, cane sugar, green tea, yuzu, lemon juice, mint, erythritol, steviol glycosides, spirulina                                                                                                                                                                         | 2.82 | 3.6  | <0.2  | <0.2 |
| K20 | H | Plastic                | Cranberry                         | Water, tea, cranberry juice, beet sugar and multifruit juice (aronia, apple, elderberry, lemon, acerola),                                                                                                                                                                | 3.08 | 4.5  | <0.5g | <0.5 |
| K21 | H | Plastic                | Lemon & ginger                    | Water, tea, lemon juice, beet sugar, ginger juice, apple juice and ginger extract                                                                                                                                                                                        | 2.98 | 4.4  | <0.5  | <0.5 |
| K22 | I | Plastic                | Passion fruit (zero)              | Water, cane sugar*, green tea, stevia leaves, natural passion fruit flavor                                                                                                                                                                                               | 3.14 | 0.0  | 0.0   | 0.0  |
| K23 | I | Plastic                | Raspberry (zero)                  | Water, cane sugar*, green tea, stevia leaves, natural raspberry flavor and carrot concentrate                                                                                                                                                                            | 3.25 | 0.0  | 0.0   | 0.0  |
| K24 | I | Plastic                | Raspberry                         | Water, cane sugar, green tea, stevia leaves, natural raspberry flavor, and carrot, apple and blackcurrant extracts                                                                                                                                                       | 3.17 | 4.4  | 0.0   | 0.0  |
| K25 | I | Plastic                | Original                          | Water, cane sugar, green tea, stevia leaves and tea extract                                                                                                                                                                                                              | 3.18 | 4.4  | 0.0   | 0.0  |
| K26 | I | Plastic                | Ginger & lemon                    | Water, cane sugar, green tea, stevia leaves, natural ginger flavor and natural lemon flavor                                                                                                                                                                              | 3.09 | 4.4  | 0.0   | 0.0  |

\*totally consumed during fermentation
